# Supplementary material for: Porcine circovirus type 1 was undetected in vaccine but could be cultured in the cell substrate of Lanzhou lamb rotavirus vaccine
Source: PubMed Central journal article supplement (PMC5882086; doi:10.1099/jgv.0.000875), 2017-11-22
Supplement: jgv-99-103-s001.pdf [file jgv-99-103-s001.pdf]

**Supplementary table 1. Batch number of vaccines detected**

| <b>Year</b>         | <b>2010</b> | <b>2011</b> |           | <b>2012</b> |           |           | <b>2014</b> | <b>2015</b> |           |
|---------------------|-------------|-------------|-----------|-------------|-----------|-----------|-------------|-------------|-----------|
| <b>Batch number</b> | 201006084   | 201101001   | 201109106 | 201200469   | 201203046 | 201204083 | 201407105   | 201501023   | 201511107 |
|                     | 201008107   | 201101003   | 201109111 | 201201002   | 201203047 | 201204084 | 201409116   | 201501026   | 201511108 |
|                     | 201008108   | 201101006   | 201109112 | 201201003   | 201203048 | 201204085 | 201411146   | 201501027   | 201511109 |
|                     | 201008109   | 201101007   | 201109114 | 201201005   | 201203049 | 201205087 | 201411147   | 201504035   | 201511113 |
|                     | 201008110   | 201101008   | 201109116 | 201201006   | 201203051 | 201205088 | 201411148   | 201504036   | 201511116 |
|                     | 201008113   | 201103009   | 201110117 | 201201007   | 201203058 | 201205091 | 201412149   | 201504037   | 201511117 |
|                     | 201008114   | 201103010   | 201110121 | 201201015   | 201203059 | 201205092 | 201412150   | 201504038   | 201511118 |
|                     | 201008115   | 201103012   | 201110132 | 201201016   | 201203060 | 201205094 | 201412156   | 201504040   | 201511119 |
|                     | 201008116   | 201103014   | 201112073 | 201201018   | 201203062 | 201205096 | 201412157   | 201504041   | 201511120 |
|                     | 201009120   | 201103019   | 201112158 | 201202024   | 201203066 | 201205097 | 201412159   | 201504052   | 201511121 |
|                     | 201009121   | 201104020   | 201112160 | 201202025   | 201204042 | 201205102 | 201412163   | 201506076   | 201511122 |
|                     | 201009127   | 201108092   | 201112164 | 201202026   | 201204069 | 201205103 | 201412164   | 201506076   | 201511123 |
|                     | 201010129   | 201108095   | 201112165 | 201202029   | 201204070 | 201205106 |             | 201506077   | 201511124 |
|                     | 201010131   | 201108096   | 201112166 | 201202035   | 201204073 | 201207140 |             | 201506078   | 201511125 |
|                     | 201010133   | 201108098   | 201112167 | 201202037   | 201204075 | 201209169 |             | 201511102   | 201511126 |
|                     | 201012134   | 201109102   | 201112170 | 201202038   | 201204076 | 201209171 |             | 201511103   | 201512127 |
|                     | 201012137   | 201109103   | 201112171 | 201202039   | 201204077 | 201209173 |             | 201511104   | 201512128 |
|                     | 201012138   | 201109105   | 201112176 | 201202040   | 201204078 | 201209174 |             | 201511105   | 201512129 |
|                     | 201012139   |             |           | 201202041   | 201204079 | 201209176 |             | 201511106   | 201512130 |
|                     | 201012145   |             |           | 201202042   | 201204080 | 201210187 |             |             |           |
|                     |             |             |           | 201202043   | 201204081 | 201212140 |             |             |           |
|                     |             |             |           | 201202044   | 201204082 |           |             |             |           |
